# Supplementary material for: Non-Lactic Probiotic Beverage Enriched with Microencapsulated Red Propolis: Microorganism Viability, Physicochemical Characteristics, and Sensory Perception
Source: MDPI journal article supplement (doi:10.3390/fermentation9030234), 2023-02-28
Supplement: s1 [file s1]

Supplementary Table 1: Alkanes and their respective retention time and index.

| Alkanes           | Ret. Time | Index |
|-------------------|-----------|-------|
| Heptane (C7)      | 1.756     | 700   |
| Dodecane (C12)    | 7.971     | 1200  |
| Tetradecane (C14) | 11.451    | 1400  |
| Octadecane(C18)   | 16.456    | 1800  |
| Nonadecane (C19)  | 18.521    | 1900  |
