# Supplementary material for: Non-Lactic Probiotic Beverage Enriched with Microencapsulated Red Propolis: Microorganism Viability, Physicochemical Characteristics, and Sensory Perception
Source: MDPI journal article supplement (doi:10.3390/fermentation9030234), 2023-02-28

Time: Start of fermentation (substrate)

Control:

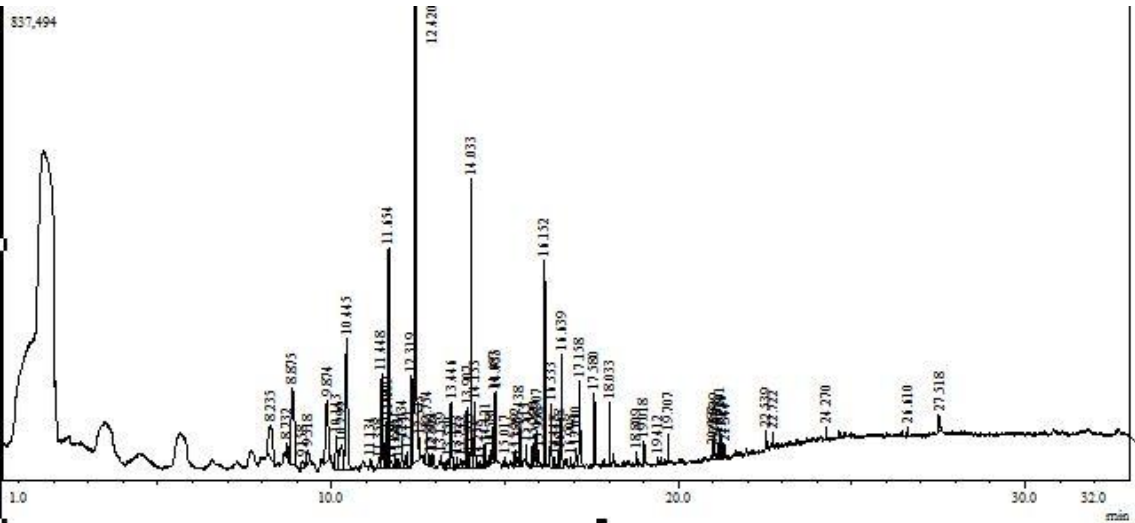

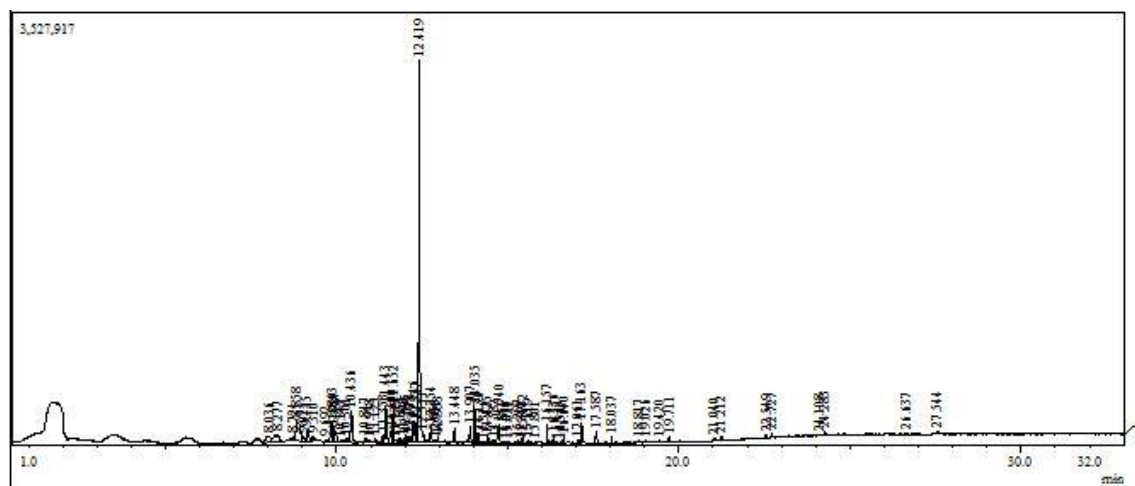

Time: End of fermentation

Control:

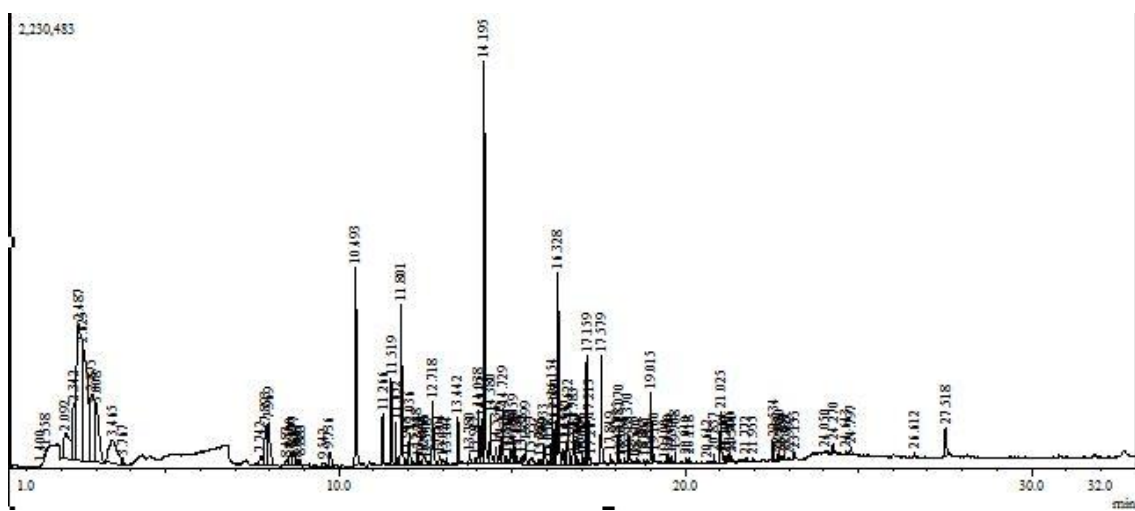

Extract:

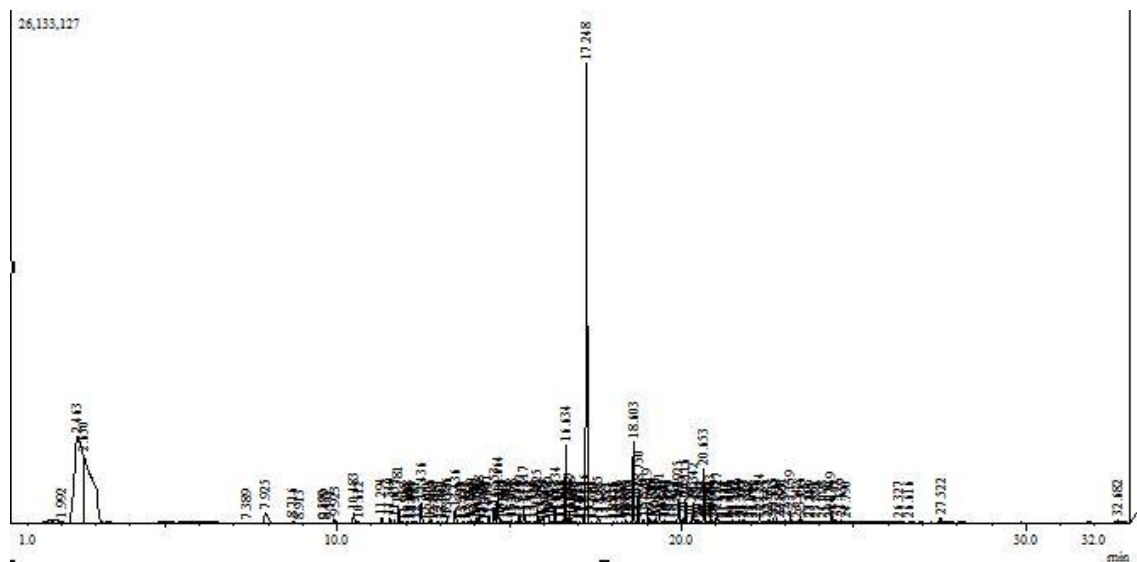

Microcapsule:

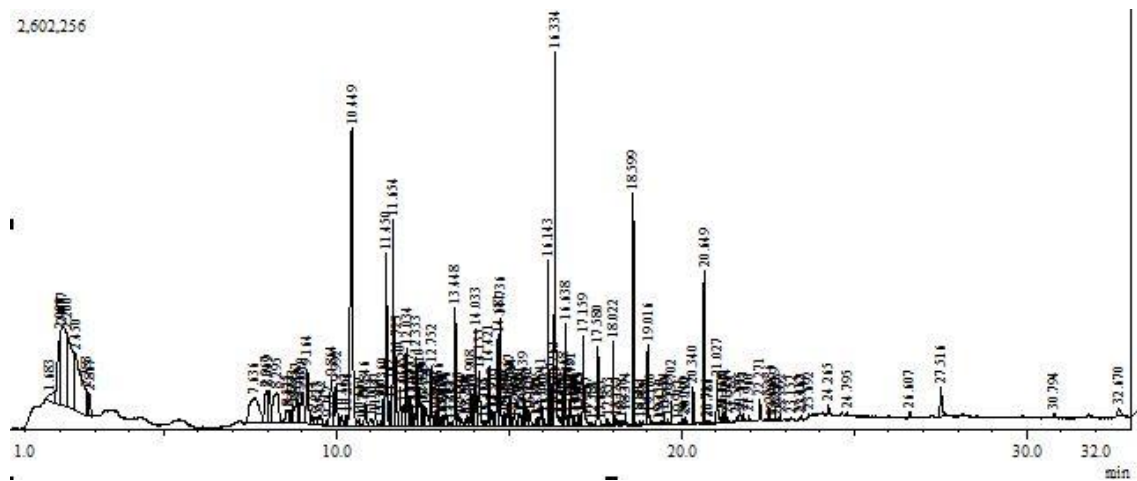

Time: 28 days of storage at 4°C

Control:

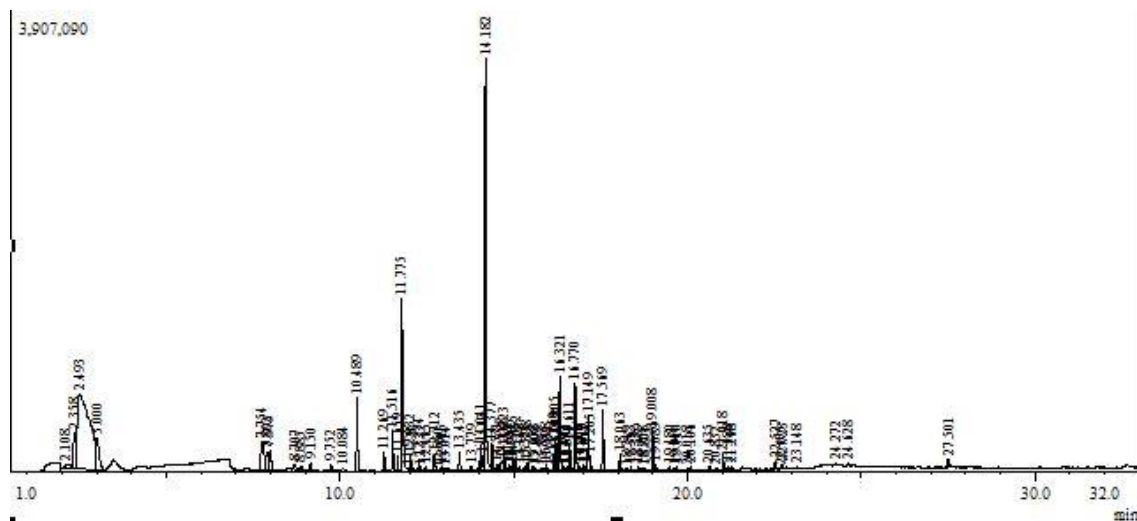

Extract:

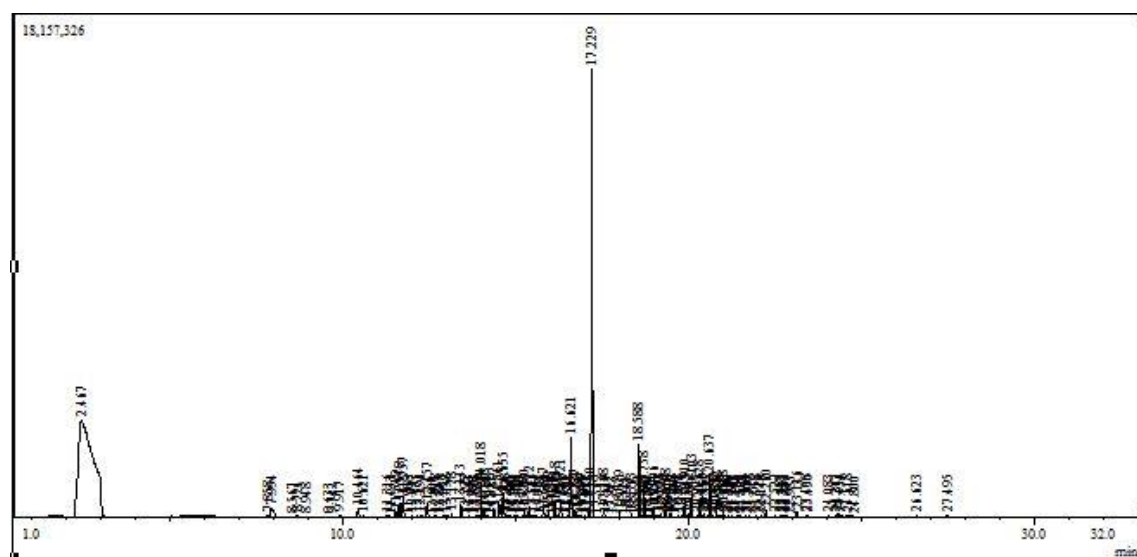

Microcapsule:

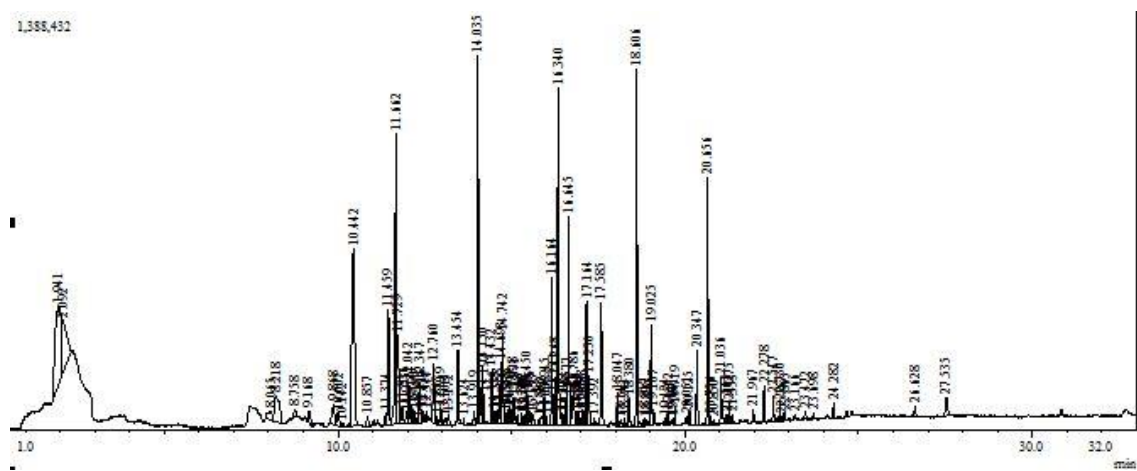

Supplement: s1 [file s1]
