# Supplementary figures and images for: Non-Lactic Probiotic Beverage Enriched with Microencapsulated Red Propolis: Microorganism Viability, Physicochemical Characteristics, and Sensory Perception
Source: MDPI journal article supplement (doi:10.3390/fermentation9030234), 2023-02-28

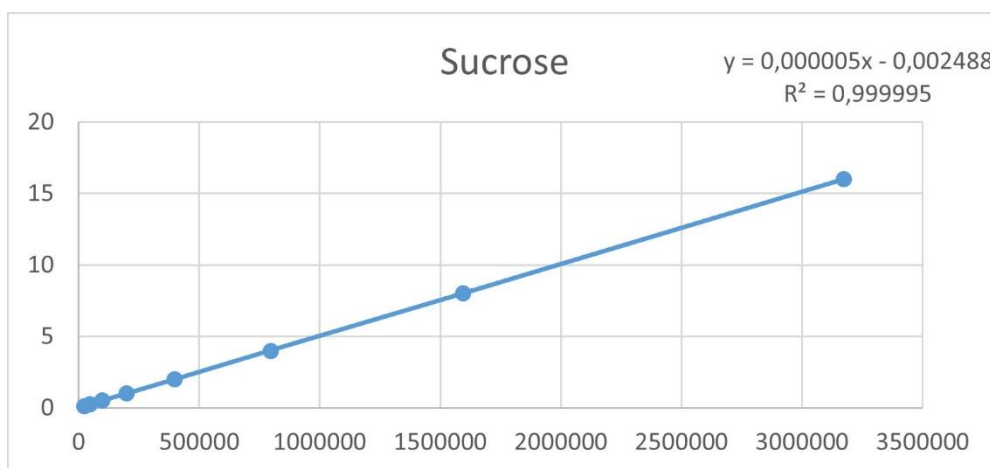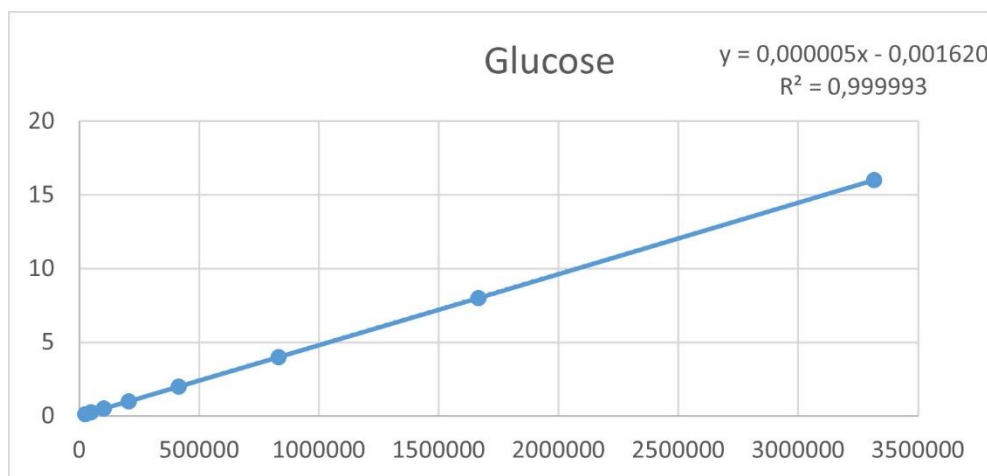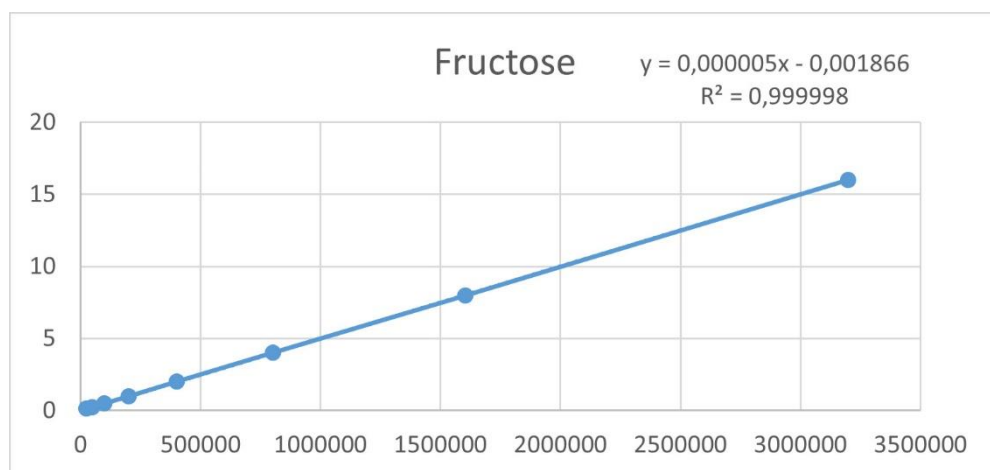

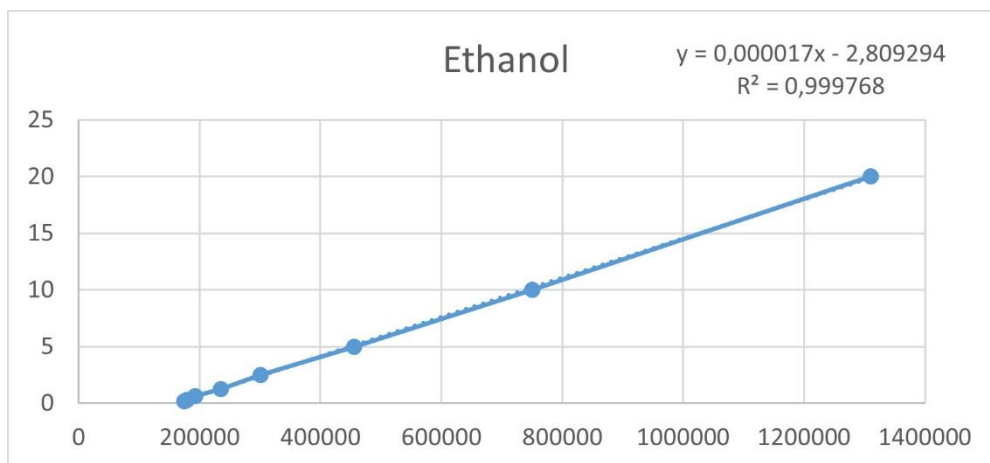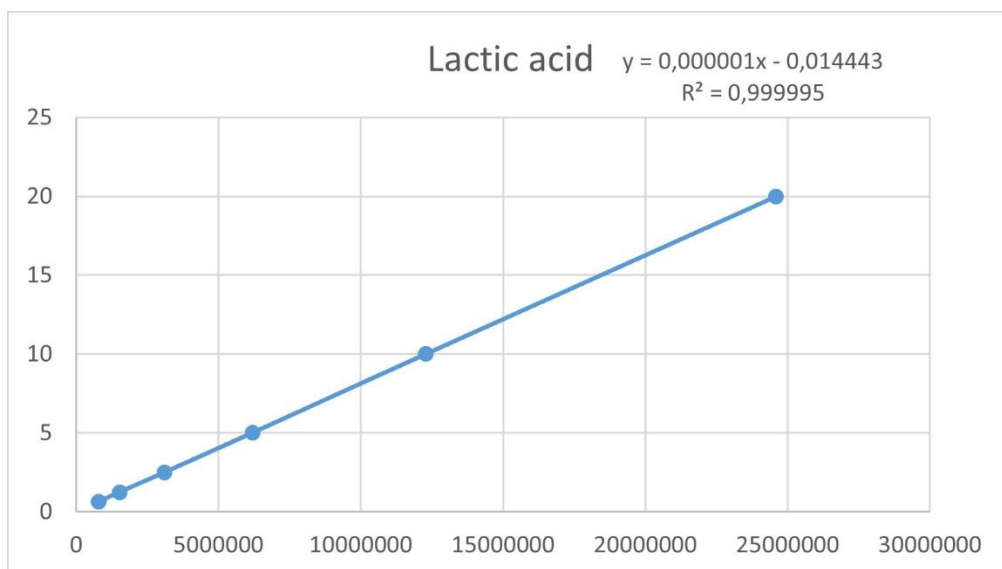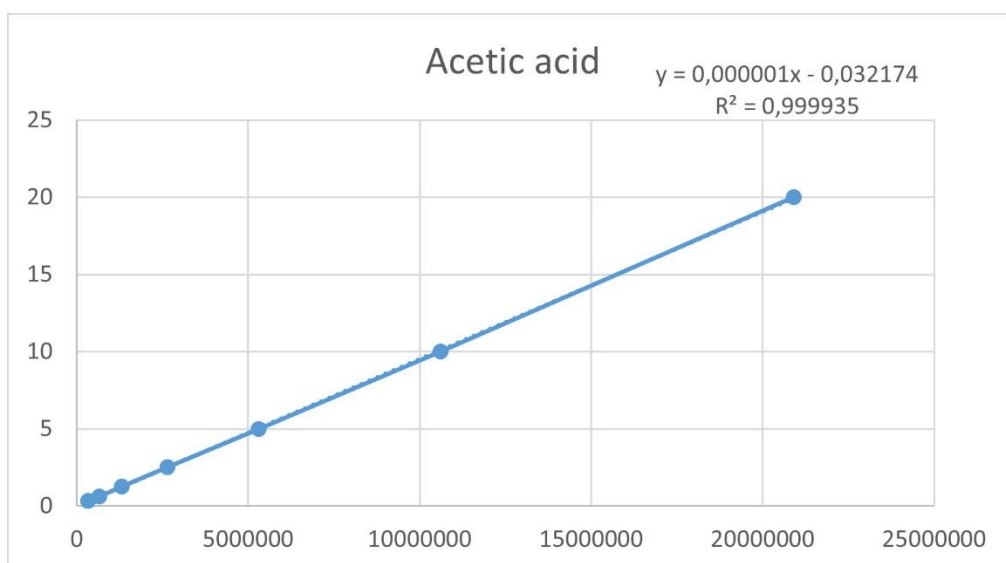

Malic acid

$y = 0,000001x - 0,001917$   
 $R^2 = 0,999968$

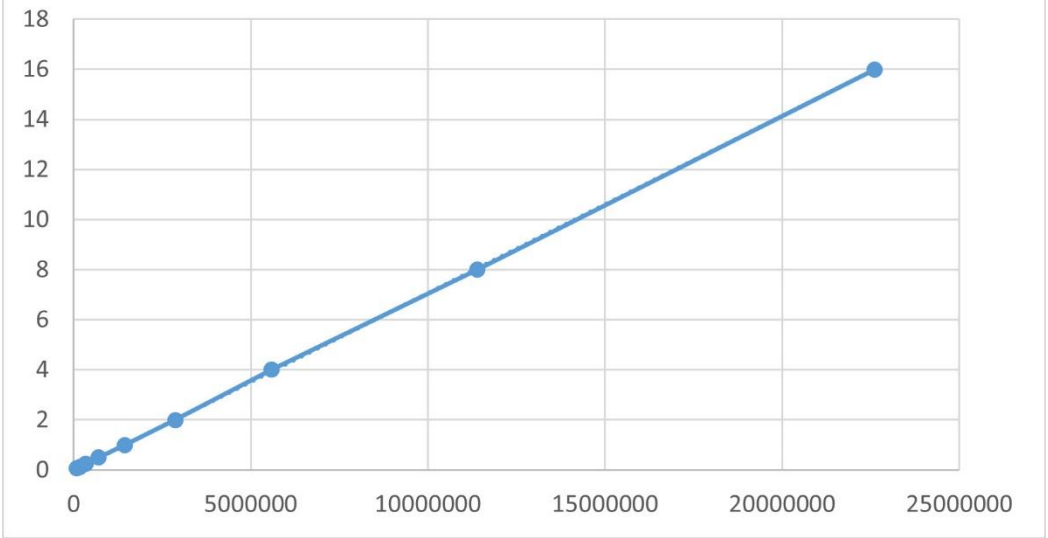

Supplement: s1 [file s1]
